# Supplementary material for: Oxygen Availability during Growth Modulates the Phytochemical Profile and the Chemo-Protective Properties of Spinach Juice
Source: PubMed Central journal article supplement (PMC6406831; doi:10.3390/biom9020053), 2019-02-04

Article

## Oxygen Availability During Growth Modulates the Phytochemical Profile and the Chemoprotective Properties of Spinach Juice

Francesco Milano <sup>1</sup>, Francesca Mussi <sup>1,2</sup>, Silvia Fornaciari <sup>2</sup>, Meltem Altunoz <sup>2</sup>, Luca Forti <sup>2</sup>, Laura Arru <sup>2,\*</sup> and Annamaria Buschini <sup>1,3</sup>

<sup>1</sup> Dipartimento di Scienze Chimiche, della Vita e della Sostenibilità Ambientale, Università degli Studi di Parma, Parco Area delle Scienze 11/A, 43124 Parma, IT; [francesco.milano@gmail.com](mailto:francesco.milano@gmail.com) (F.M.); [francesca.mussi@unipr.it](mailto:francesca.mussi@unipr.it) (F.M.); [annamaria.buschini@unipr.it](mailto:annamaria.buschini@unipr.it) (A.B.)

<sup>2</sup> Dipartimento di Scienze della Vita, Università degli Studi di Modena e Reggio Emilia, via Amendola 2, 42122 Reggio Emilia, IT; [fornaciari04@gmail.com](mailto:fornaciari04@gmail.com) (S.F.); [meltem.altunoz@unimore.it](mailto:meltem.altunoz@unimore.it) (M.A.); [luca.forti@unimore.it](mailto:luca.forti@unimore.it) (L.F.); [laura.arru@unimore.it](mailto:laura.arru@unimore.it) (L.A.)

<sup>3</sup> COMT (Centro di Oncologia Molecolare e Traslazionale), Università degli Studi di Parma, Parco Area delle Scienze 11/A, 43124 Parma, IT; [annamaria.buschini@unipr.it](mailto:annamaria.buschini@unipr.it) (A.B.)

### *Supplementary materials*

**Table S1.** Monitoring of changes in O<sub>2</sub> levels in the nutrient solution.

Changes in O<sub>2</sub> levels in the nutrient solution used for hydroponic spinach growth after during normoxia, induction of hypoxia and subsequent reoxygenation. Values refer to tanks with 10 L of nutrient solution and 44 plants per tank.

| Day                       | time  | air saturation (%) | O <sub>2</sub> (mg/l) | water temperature (°C) |
|---------------------------|-------|--------------------|-----------------------|------------------------|
| <b>NORMOXIC TREATMENT</b> |       |                    |                       |                        |
| <b>day 1</b>              | 9:30  | 81                 | 7.1                   | 21.5                   |
|                           | 10:30 | 83                 | 7.2                   | 22.0                   |
|                           | 11:30 | 84                 | 7.2                   | 22.9                   |
|                           | 12:30 | 80                 | 6.8                   | 22.8                   |
|                           | 13:30 | 79                 | 6.6                   | 23.3                   |
|                           | 15:30 | 80                 | 6.7                   | 23.9                   |
|                           | 17:30 | 81                 | 6.7                   | 24.5                   |
|                           | 19:30 | 84                 | 6.8                   | 24.9                   |
|                           | 21:30 | 83                 | 6.8                   | 24.8                   |
| <b>day 2</b>              | 11:30 | 86                 | 7.1                   | 23.5                   |
|                           | 13:00 | 86                 | 7.0                   | 24.8                   |
| <b>HYPOXIC TREATMENT</b>  |       |                    |                       |                        |
| <b>day 1</b>              | 9:30  | 87                 | 7.4                   | 21.9                   |
|                           | 10:30 | 83                 | 7.2                   | 21.6                   |
|                           | 11:30 | 84                 | 7.3                   | 22.0                   |
|                           | 12:30 | 80                 | 6.8                   | 22.4                   |
|                           | 13:30 | 68                 | 5.8                   | 23.1                   |
|                           | 15:30 | 56                 | 4.7                   | 23.6                   |
|                           | 17:30 | 46                 | 3.8                   | 24.3                   |
|                           | 19:30 | 39                 | 3.2                   | 24.8                   |
|                           | 21:30 | 34                 | 2.8                   | 24.6                   |
| <b>day 2</b>              | 11:30 | 12                 | 1.0                   | 23.8                   |
|                           | 13:00 | 6                  | 0.5                   | 24.7                   |
| <b>REOXYGENATION</b>      |       |                    |                       |                        |
| <b>day 2</b>              | 9:30  | 32                 | 2.7                   | 21.5                   |
|                           | 10:00 | 63                 | 5.5                   | 22.0                   |
|                           | 11:00 | 70                 | 6.0                   | 22.5                   |
|                           | 13:00 | 74                 | 6.2                   | 23.0                   |

**Figure S1. LC-MS profile of the extract**

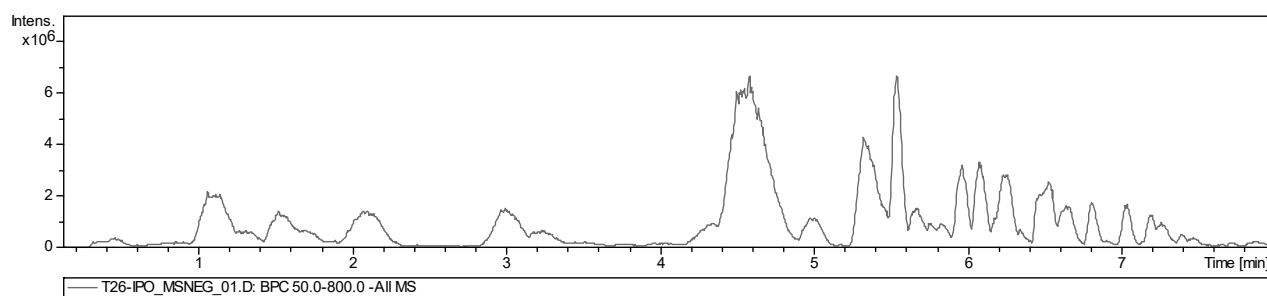

Figure S2. Negative mode ESI-MS spectra

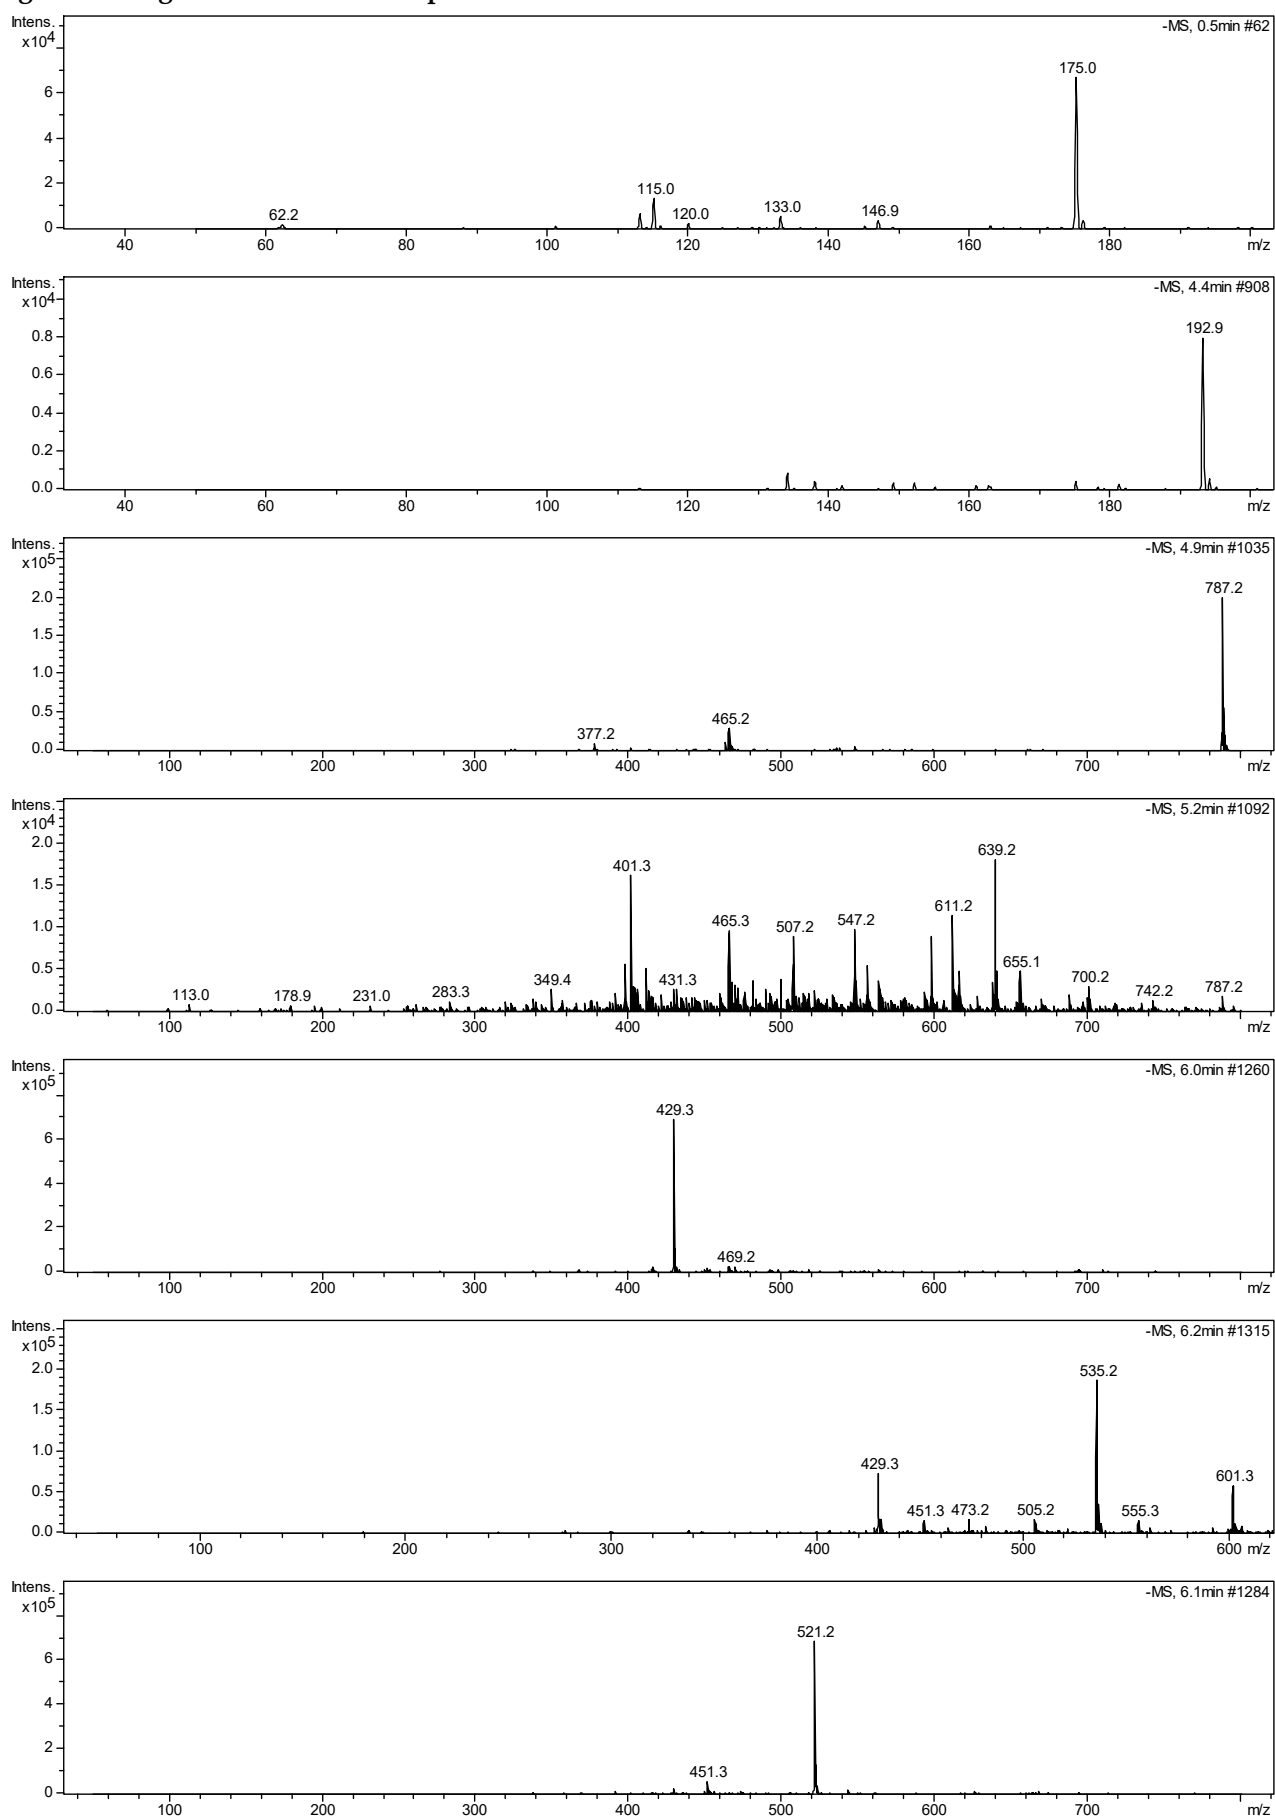

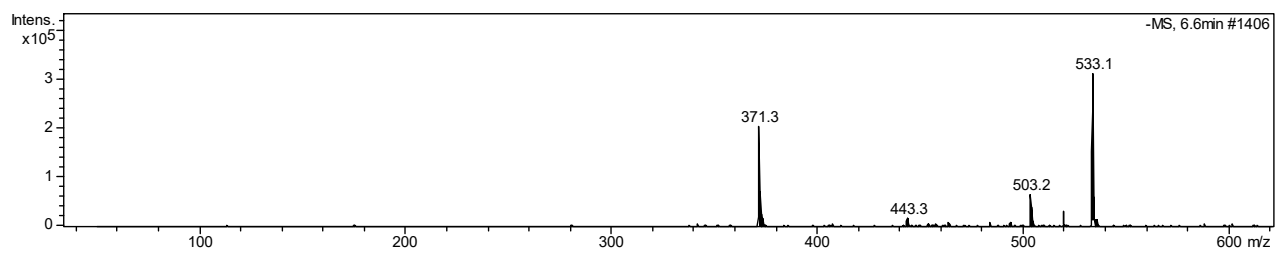

**Figure S3. Comet Assay**

Images of HT-29 nuclei of cells treated with: A – untreated cells; B- H<sub>2</sub>O<sub>2</sub> (100 μM, 5 min); C - normoxic juice (5%, 24h)+ H<sub>2</sub>O<sub>2</sub> (100 μM, 5 min); D - hypoxic juice (5%, 24h) + H<sub>2</sub>O<sub>2</sub> (100 μM, 5 min); E reoxygenated juice (5%, 24h hypoxia + 2h reoxygenation) + H<sub>2</sub>O<sub>2</sub> (100 μM, 5 min).

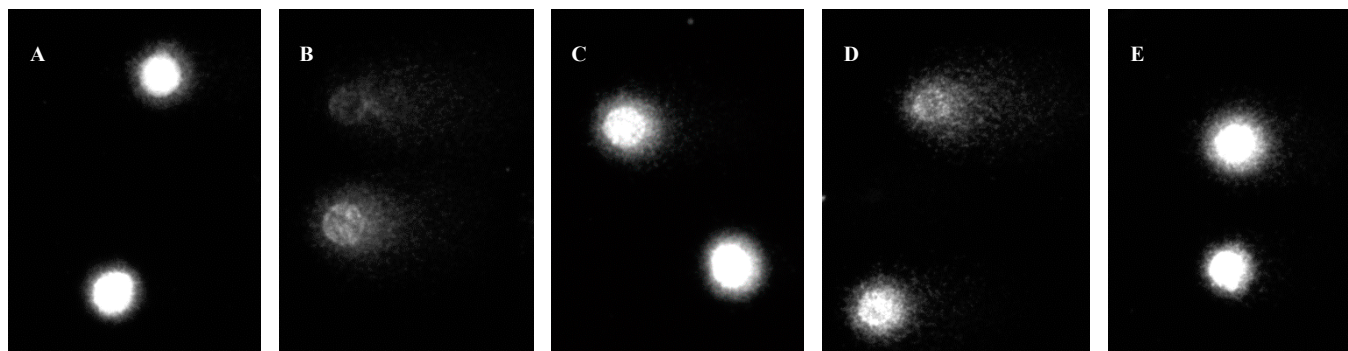

Supplement: biomolecules-09-00053-s001.pdf [file biomolecules-09-00053-s001.pdf]
